# Supplementary material
Source: PubMed Central journal article supplement (PMC9898456)
Supplement: NIHMS1828107-supplement-1.pdf [file NIHMS1828107-supplement-1.pdf]

## SUPPLEMENTARY TABLES.

**Table S1:** The categories and neighborhood-level variables included in analysis as explanatory variables

| Categories                                                  | Neighborhood-level variables                             | ADI indicators |
|-------------------------------------------------------------|----------------------------------------------------------|----------------|
| 1. Race / Ethnicity                                         | % Non-Hispanic White                                     |                |
|                                                             | % Non-Hispanic Black or African American                 |                |
|                                                             | % Non-Hispanic American Indian and Alaska Native         |                |
|                                                             | % Non-Hispanic Asian                                     |                |
|                                                             | % Non-Hispanic Native Hawaiian, Pacific Islander         |                |
|                                                             | % Non-Hispanic Other + 2 or more races                   |                |
|                                                             | % Hispanic or Latino                                     |                |
| 2. Citizenship                                              | % Population; not a US Citizen                           |                |
|                                                             | % Population; foreign-born                               |                |
|                                                             | % of Foreign-born; born in Latin America                 |                |
| 3. Age and Sex                                              | % of Population; 50 to 59 y.o.                           |                |
|                                                             | % of Population; 60 y.o. and above                       |                |
|                                                             | % of Population; Male                                    |                |
| 4. Socioeconomic Status                                     | % of 18 to 34 years with no health insurance             |                |
|                                                             | % of 35 to 64 years with no health insurance             |                |
|                                                             | % of 65 years and over with no health insurance          |                |
|                                                             | Area Deprivation Index <sup>a</sup>                      |                |
|                                                             | <b>Poverty</b>                                           |                |
|                                                             | Median family income, \$                                 | (1)            |
|                                                             | Income disparity                                         | (2)            |
|                                                             | Families below poverty level                             | (3)            |
|                                                             | % Population below 150% poverty threshold                | (4)            |
|                                                             | % Single parent households with dependents <18           | (5)            |
|                                                             | % Households without a motor vehicle                     | (6)            |
|                                                             | % Households without a telephone                         | (7)            |
|                                                             | % Occupied housing units without complete plumbing       | (8)            |
|                                                             | <b>Housing</b>                                           |                |
|                                                             | % Owner occupied housing units                           | (9)            |
|                                                             | % Households with > 1 person per room                    | (10)           |
|                                                             | Median monthly mortgage, \$                              | (11)           |
| Median gross rent, \$                                       | (12)                                                     |                |
| Median home value, \$                                       | (13)                                                     |                |
| <b>Employment</b>                                           |                                                          |                |
| % Employed person 16+ in white collar occupation            | (14)                                                     |                |
| % Civilian labor force unemployed (age 16+)                 | (15)                                                     |                |
| <b>Education</b>                                            |                                                          |                |
| % Population aged 25+ with <9yr education                   | (16)                                                     |                |
| % Population aged 25+ with at least a high school education | (17)                                                     |                |
| 5. Industry                                                 | % in Agriculture, forestry industry                      |                |
|                                                             | % in Construction industry                               |                |
|                                                             | % in Manufacturing category                              |                |
|                                                             | % in Transportation and warehousing etc.                 |                |
|                                                             | % in Professional, scientific etc.                       |                |
|                                                             | % in Educational services, and health care etc. category |                |
|                                                             | % in Other services, except public administration        |                |

<sup>a</sup>. ADI indicators. A total 17 census variables drawn from four categories, including poverty, housing, employment, and education.

**Table S2.** Census indicators (mean values) organized by age-adjusted HCC incidence rate quartiles<sup>a</sup> for Texas census tracts (N=5,205).

|                                                   | No HCC Cases<br>(n=1026) | Quartile 1<br>(n=1051) | Quartile 2<br>(n=1067) | Quartile 3<br>(n=1030) | Quartile 4<br>(n=1031) |
|---------------------------------------------------|--------------------------|------------------------|------------------------|------------------------|------------------------|
| Age-adjusted HCC incidence rate: Mean (Min, Max)  | 0.0 (0, 0)               | 5.6 (1.0, 8.0)         | 11.7 (9.0, 15.0)       | 20.3 (16.0, 26.0)      | 46.6 (27, 208)         |
| <b>Race / Ethnicity: Mean (SD)</b>                |                          |                        |                        |                        |                        |
| % Non-Hispanic White                              | 53.50 (25.13)            | 56.13 (25.9)           | 48.22 (26.92)          | 39.88 (27.33)          | 25.45 (23.51)          |
| % Non-Hispanic Black or African American          | 10.22 (13.67)            | 9.54 (12.41)           | 10.56 (14.49)          | 12.53 (17.34)          | 15.26 (20.41)          |
| % Non-Hispanic American Indian and Alaska Native  | 0.29 (0.71)              | 0.28 (0.58)            | 0.25 (0.49)            | 0.27 (0.57)            | 0.19 (0.55)            |
| % Non-Hispanic Asian                              | 5.39 (8.15)              | 4.20 (7.09)            | 3.58 (6.04)            | 2.83 (5.35)            | 2.34 (5.14)            |
| % Non-Hispanic Native Hawaiian, Pacific Islander  | 0.07 (0.32)              | 0.08 (0.58)            | 0.07 (0.37)            | 0.07 (0.37)            | 0.06 (0.34)            |
| % Non-Hispanic Other + 2 or more races            | 3.72 (3.75)              | 3.36 (3.12)            | 3.23 (3.17)            | 2.88 (3.1)             | 2.30 (3.03)            |
| % Hispanic or Latino                              | 28.60 (23.65)            | 28.03 (23.58)          | 35.64 (25.92)          | 42.93 (28.1)           | 55.49 (29.15)          |
| <b>Citizenship: Mean (SD)</b>                     |                          |                        |                        |                        |                        |
| % Population; not a US Citizen                    | 9.70 (9.73)              | 8.08 (8.36)            | 9.57 (8.64)            | 11.57 (9.82)           | 14.17 (10.3)           |
| % Population; foreign-born                        | 14.80 (11.69)            | 13.39 (11.04)          | 14.82 (11.25)          | 16.85 (12.19)          | 19.67 (12.36)          |
| % of Foreign-born; born in Latin America          | 56.75 (32.37)            | 60.03 (30.06)          | 67.38 (28.11)          | 73.86 (27.21)          | 82.18 (23.3)           |
| <b>Age and Sex: Mean (SD)</b>                     |                          |                        |                        |                        |                        |
| % of Population; 50 to 59 y.o.                    | 12.35 (4.54)             | 13.85 (3.69)           | 13.15 (3.55)           | 12.51 (3.47)           | 11.73 (3.47)           |
| % of Population; 60 y.o. and above                | 16.79 (9.15)             | 19.78 (8.39)           | 18.15 (7.76)           | 17.25 (7.25)           | 15.02 (6.19)           |
| % of Population; Male                             | 50.10 (5.56)             | 49.26 (3.96)           | 49.24 (3.49)           | 49.73 (4.29)           | 49.75 (5.04)           |
| <b>Socioeconomic Status: Mean (SD)</b>            |                          |                        |                        |                        |                        |
| Area Deprivation Index (decile)                   | 4.71 (2.95)              | 4.52 (2.58)            | 5.12 (2.71)            | 6.16 (2.68)            | 7.05 (2.64)            |
| Area Deprivation Index (score)                    | 92.29 (26.02)            | 94.11 (21.41)          | 98.39 (18.88)          | 103.93 (17.07)         | 108.22 (14.35)         |
| % of 18 to 34 years with no health insurance      | 28.66 (17.99)            | 30.24 (15.95)          | 33.30 (16.4)           | 38.76 (16.61)          | 43.17 (16.5)           |
| % of 35 to 64 years with no health insurance      | 21.57 (14.55)            | 20.71 (13.05)          | 23.30 (13.28)          | 28.39 (13.74)          | 33.00 (13.77)          |
| % of 65 years and over with no health insurance   | 2.12 (5.55)              | 1.88 (4.69)            | 2.03 (4.51)            | 2.57 (5.09)            | 3.00 (5.87)            |
| <b>Industry: Mean (SD)</b>                        |                          |                        |                        |                        |                        |
| % in Agriculture, forestry industry               | 4.66 (7.07)              | 4.09 (4.99)            | 3.64 (4.96)            | 3.71 (5.33)            | 2.85 (4.57)            |
| % in Construction industry                        | 6.50 (5.35)              | 7.41 (4.76)            | 8.04 (5.18)            | 8.97 (5.92)            | 10.52 (6.76)           |
| % in Manufacturing category                       | 8.47 (5.23)              | 9.42 (4.81)            | 9.24 (5.06)            | 9.03 (4.96)            | 8.62 (5.05)            |
| % in Transportation and warehousing etc.          | 5.08 (3.4)               | 5.38 (3.06)            | 5.52 (3.25)            | 5.51 (3.28)            | 5.72 (3.55)            |
| % in Professional, scientific etc.                | 11.52 (6.87)             | 10.88 (5.65)           | 10.42 (5.27)           | 10.01 (4.99)           | 9.90 (4.85)            |
| % in Educational services, and health care etc.   | 22.09 (7.86)             | 22.19 (6.51)           | 21.70 (6.65)           | 21.42 (7.35)           | 20.91 (7.6)            |
| % in Other services, except public administration | 4.99 (3.07)              | 5.19 (2.59)            | 5.42 (2.67)            | 5.64 (2.91)            | 5.94 (3.12)            |

<sup>a</sup> After separating out the census tracts that had no HCC (i.e., age-adjusted rate = 0) into a separate group, we categorized the rest of the census tracts into four groups using a quartile classification method. Descriptive data for each explanatory variable were computed across 5 HCC groups.

**Table S3:** Bivariate analysis of neighborhood-level explanatory variables and incidence of HCC in Texas (N census tracts = 5,205).

|                                                          | Coeff  | 95% CI |        | IRR   | 95% CI |       | P value  |
|----------------------------------------------------------|--------|--------|--------|-------|--------|-------|----------|
|                                                          |        | Lower  | Upper  |       | Lower  | Upper |          |
| <b>Race / Ethnicity</b>                                  |        |        |        |       |        |       |          |
| % Non-Hispanic White                                     | -0.104 | -0.113 | -0.096 | 0.901 | 0.893  | 0.909 | < 0.00   |
| % Non-Hispanic Black or African American                 | 0.062  | 0.047  | 0.076  | 1.064 | 1.048  | 1.079 | < 0.00   |
| % Non-Hispanic American Indian and Alaska Native         | -0.675 | -1.157 | -0.193 | 0.509 | 0.315  | 0.824 | < 0.01   |
| % Non-Hispanic Asian                                     | -0.398 | -0.443 | -0.353 | 0.672 | 0.642  | 0.702 | < 0.00   |
| % Non-Hispanic Native Hawaiian, Pacific Islander         | -0.538 | -1.194 | 0.118  | 0.584 | 0.303  | 1.126 | < 0.11 † |
| % Non-Hispanic Other + 2 or more races                   | -0.580 | -0.661 | -0.499 | 0.560 | 0.517  | 0.607 | < 0.00   |
| % Hispanic or Latino                                     | 0.097  | 0.089  | 0.105  | 1.102 | 1.093  | 1.111 | < 0.00   |
| <b>Citizenship</b>                                       |        |        |        |       |        |       |          |
| % Population; not a US Citizen                           | 0.088  | 0.062  | 0.114  | 1.092 | 1.064  | 1.120 | < 0.00   |
| % Population; foreign-born                               | 0.043  | 0.022  | 0.063  | 1.044 | 1.022  | 1.065 | < 0.00   |
| % of Foreign-born; born in Latin America                 | 0.114  | 0.106  | 0.123  | 1.121 | 1.112  | 1.131 | < 0.00   |
| <b>Age and Sex</b>                                       |        |        |        |       |        |       |          |
| % of Population; 50 to 59 y.o.                           | 0.059  | -0.008 | 0.127  | 1.061 | 0.992  | 1.135 | < 0.08   |
| % of Population; 60 y.o. and above                       | 0.102  | 0.070  | 0.134  | 1.108 | 1.073  | 1.144 | < 0.00   |
| % of Population; Male                                    | 0.003  | -0.049 | 0.054  | 1.003 | 0.953  | 1.056 | < 0.91 † |
| <b>Socioeconomic Status</b>                              |        |        |        |       |        |       |          |
| Area Deprivation Index (decile)                          | 1.231  | 1.150  | 1.312  | 3.425 | 3.159  | 3.714 | < 0.00   |
| % of 18 to 34 years with no health insurance             | 0.173  | 0.159  | 0.187  | 1.189 | 1.173  | 1.205 | < 0.00   |
| % of 35 to 64 years with no health insurance             | 0.184  | 0.168  | 0.201  | 1.202 | 1.182  | 1.222 | < 0.00   |
| % of 65 years and over with no health insurance          | 0.007  | -0.042 | 0.055  | 1.007 | 0.959  | 1.057 | < 0.78 † |
| <b>Industry</b>                                          |        |        |        |       |        |       |          |
| % in Agriculture, forestry industry                      | -0.083 | -0.133 | -0.032 | 0.921 | 0.875  | 0.968 | < 0.00   |
| % in Construction industry                               | 0.355  | 0.314  | 0.395  | 1.426 | 1.369  | 1.485 | < 0.00   |
| % in Manufacturing category                              | -0.042 | -0.091 | 0.008  | 0.959 | 0.913  | 1.008 | < 0.10   |
| % in Transportation and warehousing etc.                 | 0.179  | 0.105  | 0.253  | 1.196 | 1.111  | 1.288 | < 0.00   |
| % in Professional, scientific etc.                       | -0.255 | -0.302 | -0.208 | 0.775 | 0.739  | 0.812 | < 0.00   |
| % in Educational services, and health care etc. category | -0.031 | -0.066 | 0.004  | 0.970 | 0.936  | 1.004 | < 0.08   |
| % in Other services, except public administration        | 0.371  | 0.286  | 0.456  | 1.449 | 1.331  | 1.577 | < 0.00   |

The coefficient values were exponentiated; expressed in terms of relative risk (RR). Explanatory variables were rescaled in order to interpret results as increase or decrease in the risk of HCC incidence associated with a 10-unit change in predictor variable.

† Variables with P value > 0.10 in bivariate analysis.

**Table S4:** Multivariable analysis of neighborhood-level SDOH and incidence of HCC in Texas (N census tracts = 5,205). Effect estimates shown are from running a series of multivariable models where variables that represent each category were entered into the model together. Variables across categories were not included in any single model. Only variables significant at  $p \leq 0.10$  during the bivariate analysis were used.

|                                                          | Coeff  | 95% CI |        | IRR   | 95% CI |         | P value |
|----------------------------------------------------------|--------|--------|--------|-------|--------|---------|---------|
|                                                          |        | Lower  | Upper  |       | Lower  | Upper   |         |
| <b>Race / Ethnicity</b>                                  |        |        |        |       |        |         |         |
| % Non-Hispanic White                                     |        |        |        |       |        |         |         |
| % Non-Hispanic Black or African American                 | 0.105  | 0.092  | 0.119  | 1.111 | 1.096  | - 1.127 | < 0.00  |
| % Non-Hispanic American Indian and Alaska Native         | 0.291  | -0.148 | 0.730  | 1.338 | 0.862  | - 2.076 | < 0.19  |
| % Non-Hispanic Asian                                     | -0.259 | -0.304 | -0.215 | 0.772 | 0.738  | - 0.807 | < 0.00  |
| % Non-Hispanic Native Hawaiian, Pacific Islander         |        |        |        |       |        |         |         |
| % Non-Hispanic Other + 2 or more races                   | -0.152 | -0.234 | -0.070 | 0.859 | 0.792  | - 0.932 | < 0.00  |
| % Hispanic or Latino                                     | 0.093  | 0.084  | 0.102  | 1.098 | 1.088  | - 1.108 | < 0.00  |
| <b>Citizenship</b>                                       |        |        |        |       |        |         |         |
| % Population; not a US Citizen                           | -0.090 | -0.172 | -0.007 | 0.914 | 0.842  | - 0.993 | < 0.03  |
| % Population; foreign-born                               | 0.054  | -0.010 | 0.118  | 1.056 | 0.990  | - 1.126 | < 0.10  |
| % of Foreign-born; born in Latin America                 | 0.120  | 0.110  | 0.129  | 1.127 | 1.117  | - 1.138 | < 0.00  |
| <b>Age and Sex</b>                                       |        |        |        |       |        |         |         |
| % of Population; 50 to 59 y.o.                           | -0.036 | -0.110 | 0.038  | 0.964 | 0.896  | - 1.038 | < 0.34  |
| % of Population; 60 y.o. and above                       | 0.110  | 0.074  | 0.145  | 1.116 | 1.077  | - 1.156 | < 0.00  |
| % of Population; Male                                    |        |        |        |       |        |         |         |
| <b>Socioeconomic Status</b>                              |        |        |        |       |        |         |         |
| Area Deprivation Index (decile)                          | 1.021  | 0.902  | 1.141  | 2.777 | 2.464  | - 3.130 | < 0.00  |
| % of 18 to 34 years with no health insurance             | 0.076  | 0.054  | 0.098  | 1.079 | 1.055  | - 1.104 | < 0.00  |
| % of 35 to 64 years with no health insurance             | -0.031 | -0.058 | -0.003 | 0.970 | 0.944  | - 0.997 | < 0.03  |
| % of 65 years and over with no health insurance          |        |        |        |       |        |         |         |
| <b>Industry</b>                                          |        |        |        |       |        |         |         |
| % in Agriculture, forestry industry                      | -0.100 | -0.153 | -0.047 | 0.905 | 0.858  | - 0.954 | < 0.00  |
| % in Construction industry                               | 0.361  | 0.312  | 0.409  | 1.434 | 1.366  | - 1.505 | < 0.00  |
| % in Manufacturing category                              | -0.055 | -0.108 | -0.003 | 0.946 | 0.897  | - 0.997 | < 0.04  |
| % in Transportation and warehousing etc.                 | 0.181  | 0.105  | 0.256  | 1.198 | 1.111  | - 1.292 | < 0.00  |
| % in Professional, scientific etc.                       | -0.143 | -0.200 | -0.086 | 0.866 | 0.818  | - 0.917 | < 0.00  |
| % in Educational services, and health care etc. category | 0.099  | 0.054  | 0.144  | 1.104 | 1.055  | - 1.155 | < 0.00  |
| % in Other services, except public administration        | 0.274  | 0.187  | 0.362  | 1.315 | 1.205  | - 1.436 | < 0.00  |

The coefficient values were exponentiated; expressed in terms of relative risk (RR). Explanatory variables were rescaled in order to interpret results as increase or decrease in the risk of HCC incidence associated with a 10-unit change in predictor variable.

**Table S5:** Multivariable analysis of neighborhood-level SDOH and incidence of HCC in Texas (N census tracts = 5,205). Effect estimates shown are from running a series of multivariable models where variables were added across categories. Only variables significant at  $p < 0.05$  during category-specific models (Table S3) and those not affected by multicollinearity were allowed into models.

|                                                          | Coeff  | 95% CI |        | IRR   | 95% CI |         | P value |
|----------------------------------------------------------|--------|--------|--------|-------|--------|---------|---------|
|                                                          |        | Lower  | Upper  |       | Lower  | Upper   |         |
| <b>Race / Ethnicity</b>                                  |        |        |        |       |        |         |         |
| % Non-Hispanic White                                     |        |        |        |       |        |         |         |
| % Non-Hispanic Black or African American                 | 0.105  | 0.092  | 0.119  | 1.111 | 1.096  | - 1.127 | < 0.00  |
| % Non-Hispanic American Indian and Alaska Native         |        |        |        |       |        |         |         |
| % Non-Hispanic Asian                                     |        |        |        |       |        |         |         |
| % Non-Hispanic Native Hawaiian, Pacific Islander         |        |        |        |       |        |         |         |
| % Non-Hispanic Other + 2 or more races                   |        |        |        |       |        |         |         |
| % Hispanic or Latino                                     | 0.093  | 0.084  | 0.102  | 1.098 | 1.088  | - 1.108 | < 0.00  |
| <b>Citizenship</b>                                       |        |        |        |       |        |         |         |
| % Population; not a US Citizen                           |        |        |        |       |        |         |         |
| % Population; foreign-born                               |        |        |        |       |        |         |         |
| % of Foreign-born; born in Latin America                 |        |        |        |       |        |         |         |
| <b>Age and Sex</b>                                       |        |        |        |       |        |         |         |
| % of Population; 50 to 59 y.o.                           |        |        |        |       |        |         |         |
| % of Population; 60 y.o. and above                       | 0.110  | 0.074  | 0.145  | 1.116 | 1.077  | - 1.156 | < 0.00  |
| % of Population; Male                                    |        |        |        |       |        |         |         |
| <b>Socioeconomic Status</b>                              |        |        |        |       |        |         |         |
| Area Deprivation Index (decile)                          | 1.021  | 0.902  | 1.141  | 2.777 | 2.464  | - 3.130 | < 0.00  |
| % of 18 to 34 years with no health insurance             |        |        |        |       |        |         |         |
| % of 35 to 64 years with no health insurance             |        |        |        |       |        |         |         |
| % of 65 years and over with no health insurance          |        |        |        |       |        |         |         |
| <b>Industry</b>                                          |        |        |        |       |        |         |         |
| % in Agriculture, forestry industry                      | -0.100 | -0.153 | -0.047 | 0.905 | 0.858  | - 0.954 | < 0.00  |
| % in Construction industry                               | 0.361  | 0.312  | 0.409  | 1.434 | 1.366  | - 1.505 | < 0.00  |
| % in Manufacturing category                              |        |        |        |       |        |         |         |
| % in Transportation and warehousing etc.                 |        |        |        |       |        |         |         |
| % in Professional, scientific etc.                       |        |        |        |       |        |         |         |
| % in Educational services, and health care etc. category |        |        |        |       |        |         |         |
| % in Other services, except public administration        | 0.274  | 0.187  | 0.362  | 1.315 | 1.205  | - 1.436 | < 0.00  |

The coefficient values were exponentiated; expressed in terms of relative risk (RR). Explanatory variables were rescaled in order to interpret results as increase or decrease in the risk of HCC incidence associated with a 10-unit change in predictor variable.
